# Supplementary material
Source: PubMed Central journal article supplement (PMC4217651)
Supplement: NIHMS630958-supplement-01.pdf [file NIHMS630958-supplement-01.pdf]

**Supplemental Table 1- Markers for SOC Nuclei at P0**

|               | LNTB       | LSO        | MNTB       | MSO               | SPON       | VNTB       |
|---------------|------------|------------|------------|-------------------|------------|------------|
| FoxP1         | 1.5 ± 1.6  | 1.4 ± 1.3  | 1.6 ± 0.9  | 1.0 ± 1.7         | 87.3 ± 4.1 | 5.5 ± 2.8  |
| FoxP1+En1-Cre | 28.7 ± 5.4 | 28.2 ± 2.9 | 93.4 ± 1.7 | 0                 | 2.8 ± 1.0  | 13.6 ± 5.9 |
| En1-Cre       | 45.9 ± 6.0 | 11.0 ± 6.7 | 5.0 ± 1.4  | 2.9 ± 1.5         | 5.8 ± 5.1  | 80.6 ± 6.5 |
| En1-Cre+MafB  | 12.5 ± 4.1 | 1.3 ± 1.2  | 0          | 1.0 ± 1.6         | 1.7 ± 2.0  | 0          |
| MafB          | 11.4 ± 5.6 | 57.6 ± 4.3 | 0          | <i>94.6 ± 3.5</i> | 0.6 ± 0.6  | 0.3 ± 0.5  |
| FoxP1+MafB    | 0          | 0.5 ± 0.7  | 0          | 0.5 ± 0.9         | 1.8 ± 2.0  | 0          |

Numbers represent the percentage of labeled cells in a given nucleus with the respective marker expression ± standard deviation (n=3 SOC). Triple-labeled cells represent less than 1% of labeled cells in any given nucleus. *Italics type for MafB labeling of MSO indicates weaker labeling for this nucleus than is found in other nuclei (See Figs. 5 and 6).*
